# Supplementary material for: The application of tissue-engineered fish swim bladder vascular graft
Source: PubMed Central journal article supplement (PMC8492661; doi:10.1038/s42003-021-02696-9), 2021-10-05
Supplement: 42003_2021_2696_MOESM2_ESM.pdf [file 42003_2021_2696_MOESM2_ESM.pdf]

## Description of Additional Supplementary Files

**File name:** Supplementary Data

**Description:** Source data for Fig. 2-8. The sheets are named according to the figure number.
